# Supplementary material
Source: publisher figshare collection journal article supplement (https://acs.figshare.com/ndownloader/files/12790511)
Supplement: Supplementary file 1 [file 12790511]

# Oxidation of Trace Ethylene at 0 °C over Platinum Nanoparticles Supported on Silica

*Shazia S. Satter,<sup>†,‡</sup> Takuro Yokoya,<sup>†,‡</sup> Jun Hirayama,<sup>†</sup> Kiyotaka Nakajima,<sup>†</sup> and Atsushi  
Fukuoka<sup>\*,†</sup>*

<sup>†</sup>Institute for Catalysis, Hokkaido University, Kita 21 Nishi 10, Kita-ku, Sapporo, Hokkaido 001-  
0021, Japan

<sup>‡</sup>Graduate School of Chemical Sciences and Engineering, Hokkaido University, Kita 13 Nishi 8,  
Kita-ku, Sapporo, Hokkaido 060-8628, Japan

Corresponding author: Atsushi Fukuoka ([fukuoka@cat.hokudai.ac.jp](mailto:fukuoka@cat.hokudai.ac.jp)), Tel: +81-11-706-9140,  
Fax: +81-11-706-9139

Number of pages: 6

Number of figures: 6

## Contents:

**Figure S1.** Schematic representation of the flow reactor used in low temperature ethylene oxidation.

**Figure S2.** Schematic representation of an IR cell connected with a gas-flow system. The IR cell

was placed in FTIR spectroscope to monitor the oxidation of trace ethylene (200 ppm) over 10wt% Pt/SBA-15 at 0 °C.

**Figure S3.** Ethylene conversion (A) and CO<sub>2</sub> yield (B) studied for varying space velocities, SV (a) 1500 mL h<sup>-1</sup> g<sup>-1</sup> (Pt/SBA-15 0.4 g), (b) 3000 mL h<sup>-1</sup> g<sup>-1</sup> (Pt/SBA-15 0.2 g) and (c) 6000 mL h<sup>-1</sup> g<sup>-1</sup> (Pt/SBA-15 0.1 g). Reaction condition: Pt/SBA-15 (Pt 1.8%), C<sub>2</sub>H<sub>4</sub> 200 ppm, O<sub>2</sub> 20%, He balance, Flow rate 10 mL min<sup>-1</sup>.

**Figure S4.** Blank experiment, flowing mixed gas, (O<sub>2</sub>: 20%, N<sub>2</sub>: 5%, He: balance) over Pt/SBA-15 at 0 °C for 300 min, followed by CO<sub>2</sub> formation (green diamonds) by heat treatment at 150 °C (ramp rate, 1 °C min<sup>-1</sup>) under a He/N<sub>2</sub> (95%/5%) flow (10 mL min<sup>-1</sup>). Reaction conditions: catalyst Pt/SBA-15 0.40 g (Pt 1.8 wt%), O<sub>2</sub> 20%, N<sub>2</sub> 5%, He balance, SV 1500 mL h<sup>-1</sup> g<sup>-1</sup>.

**Figure S5.** Moles of ethylene converted (black circles) and CO<sub>2</sub> formed (red diamonds) over Pt/SBA-15 at 0 °C for 300 min, followed by CO<sub>2</sub> formation (green diamonds) by heat treatment at 150 °C (ramp rate, 1 °C min<sup>-1</sup>) under a O<sub>2</sub>/He/N<sub>2</sub> flow (20%/75%/5%), (10 mL min<sup>-1</sup>). Reaction conditions: catalyst Pt/SBA-15 0.40 g (Pt 1.8 wt%), C<sub>2</sub>H<sub>4</sub> 50 ppm, O<sub>2</sub> 20%, N<sub>2</sub> 5%, He balance, SV 1500 mL h<sup>-1</sup> g<sup>-1</sup>.

**Figure S6.** Time courses for ethylene conversion (black circles) and CO<sub>2</sub> yield (red diamonds) over Pt/SBA-15 at 25 °C. Reaction conditions: Pt/SBA-15 0.40 g (Pt 1.8 wt%), C<sub>2</sub>H<sub>4</sub> 50 ppm, O<sub>2</sub> 20%, N<sub>2</sub> 5 %, He balance, SV 1500 mL h<sup>-1</sup> g<sup>-1</sup>.

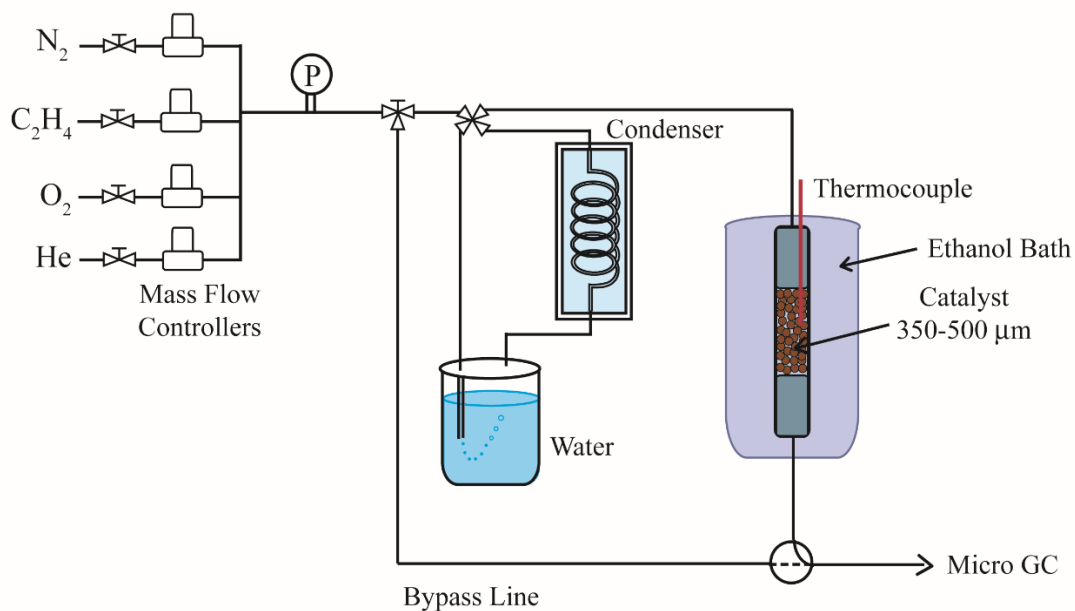

**Figure S1.** Schematic representation of the flow reactor used in low temperature ethylene oxidation.

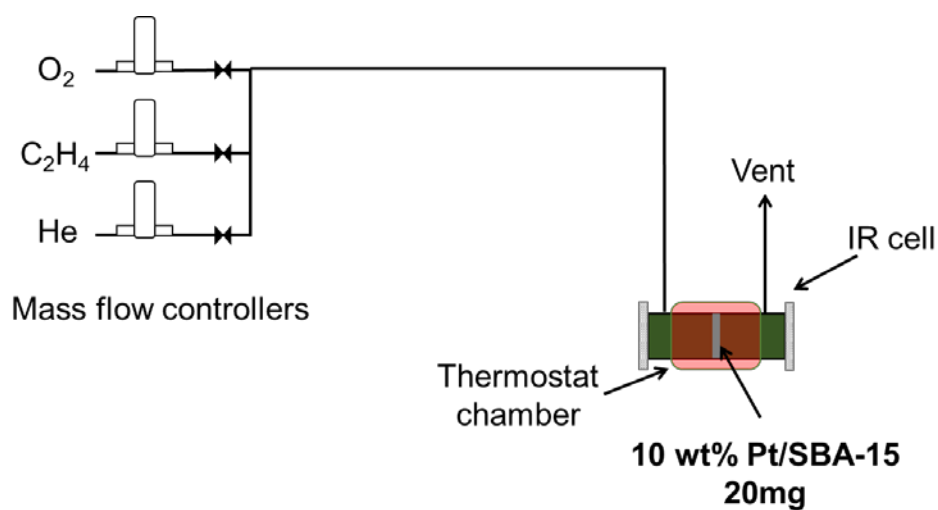

**Figure S2.** Schematic representation of an IR cell connected with a gas-flow system. The IR cell was placed in FTIR spectroscopy to monitor the oxidation of trace ethylene (200 ppm) over 10wt% Pt/SBA-15 at 0 °C.

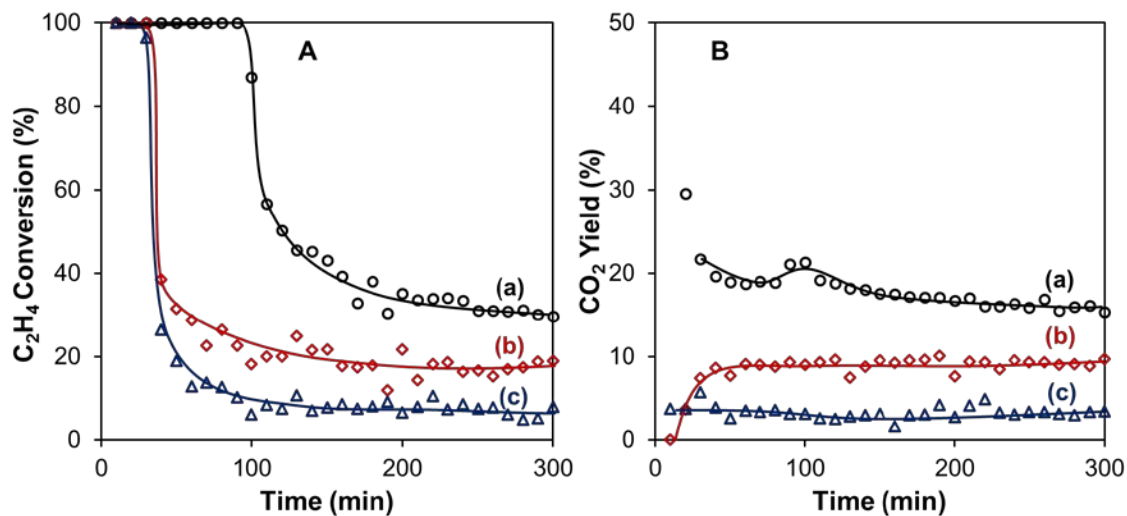

**Figure S3.** Ethylene conversion (A) and CO<sub>2</sub> yield (B) studied for varying space velocities, SV (a) 1500 mL h<sup>-1</sup> g<sup>-1</sup> (Pt/SBA-15 0.4 g), (b) 3000 mL h<sup>-1</sup> g<sup>-1</sup> (Pt/SBA-15 0.2 g) and (c) 6000 mL h<sup>-1</sup> g<sup>-1</sup> (Pt/SBA-15 0.1 g). Reaction condition: Pt/SBA-15 (Pt 1.8%), C<sub>2</sub>H<sub>4</sub> 200 ppm, O<sub>2</sub> 20%, He balance, Flow rate 10 mL min<sup>-1</sup>.

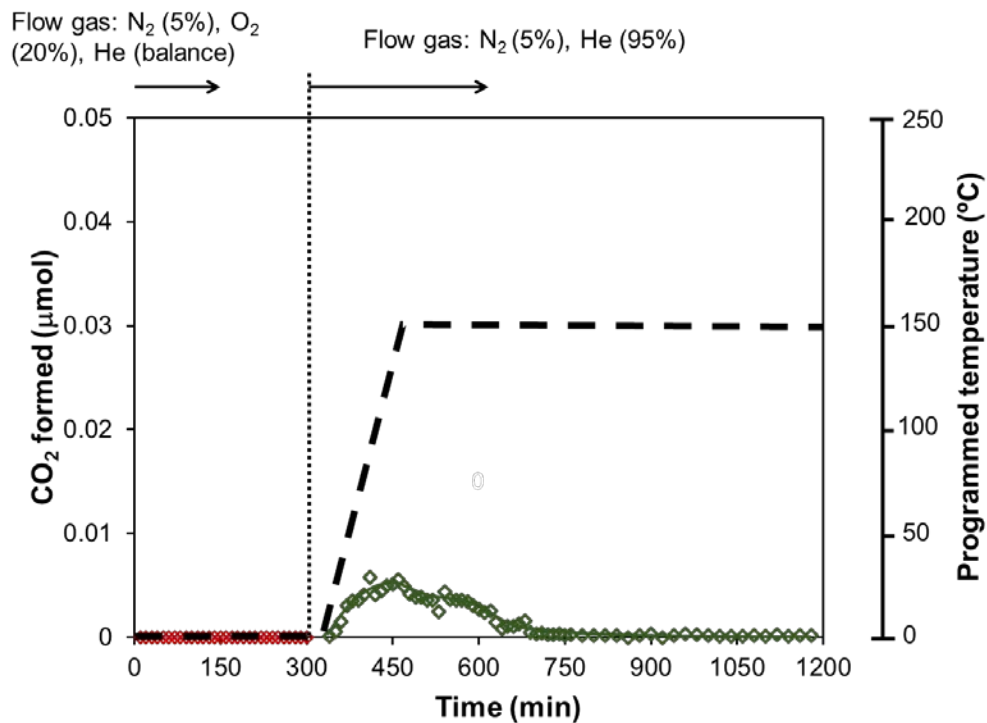

**Figure S4.** Blank experiment, flowing mixed gas, (O<sub>2</sub>: 20%, N<sub>2</sub>: 5%, He: balance) over Pt/SBA-15 at 0 °C for 300 min, followed by CO<sub>2</sub> formation (green diamonds) by heat treatment at 150 °C (ramp rate, 1 °C min<sup>-1</sup>) under a He/N<sub>2</sub> (95%/5%) flow (10 mL min<sup>-1</sup>). Reaction conditions: catalyst Pt/SBA-15 0.40 g (Pt 1.8 wt%), O<sub>2</sub> 20%, N<sub>2</sub> 5%, He balance, SV 1500 mL h<sup>-1</sup> g<sup>-1</sup>.

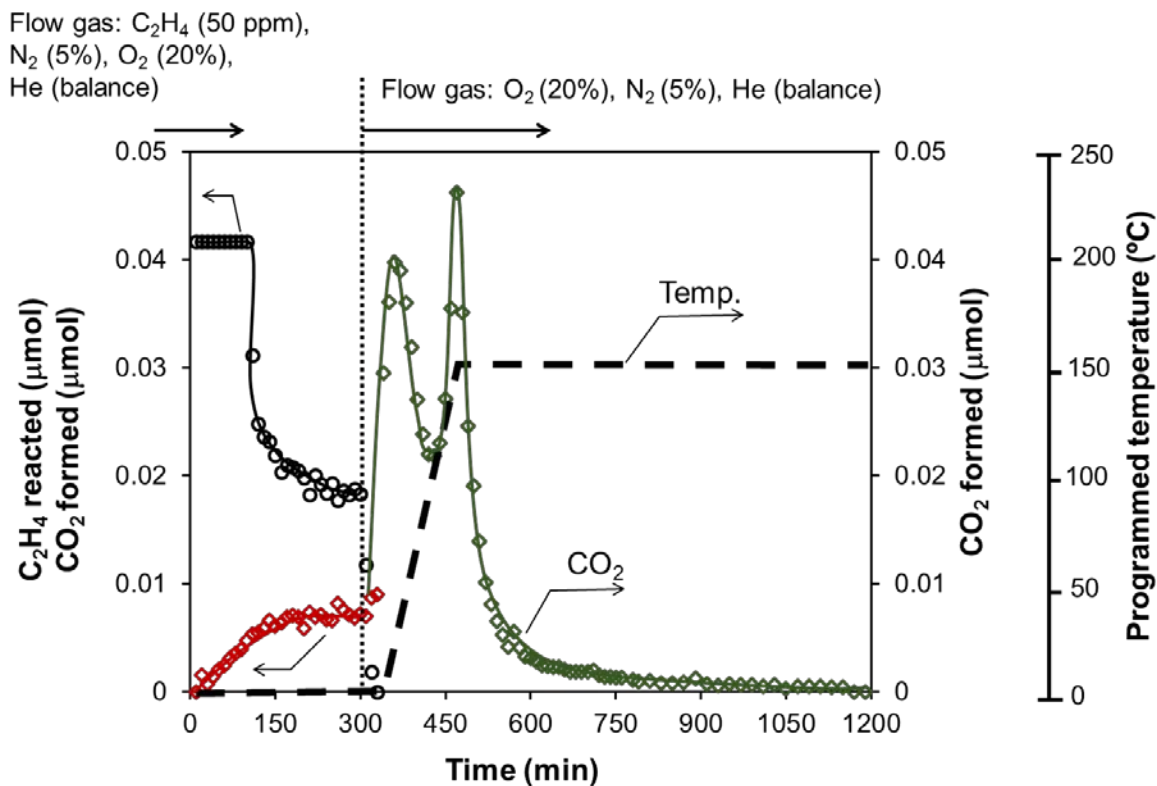

**Figure S5.** Moles of ethylene converted (black circles) and CO<sub>2</sub> formed (red diamonds) over Pt/SBA-15 at 0 °C for 300 min, followed by CO<sub>2</sub> formation (green diamonds) by heat treatment at 150 °C (ramp rate, 1 °C min<sup>-1</sup>) under a O<sub>2</sub>/He/N<sub>2</sub> flow (20%/75%/5%), (10 mL min<sup>-1</sup>). Reaction conditions: catalyst Pt/SBA-15 0.40 g (Pt 1.8 wt%), C<sub>2</sub>H<sub>4</sub> 50 ppm, O<sub>2</sub> 20%, N<sub>2</sub> 5%, He balance, SV 1500 mL h<sup>-1</sup> g<sup>-1</sup>.

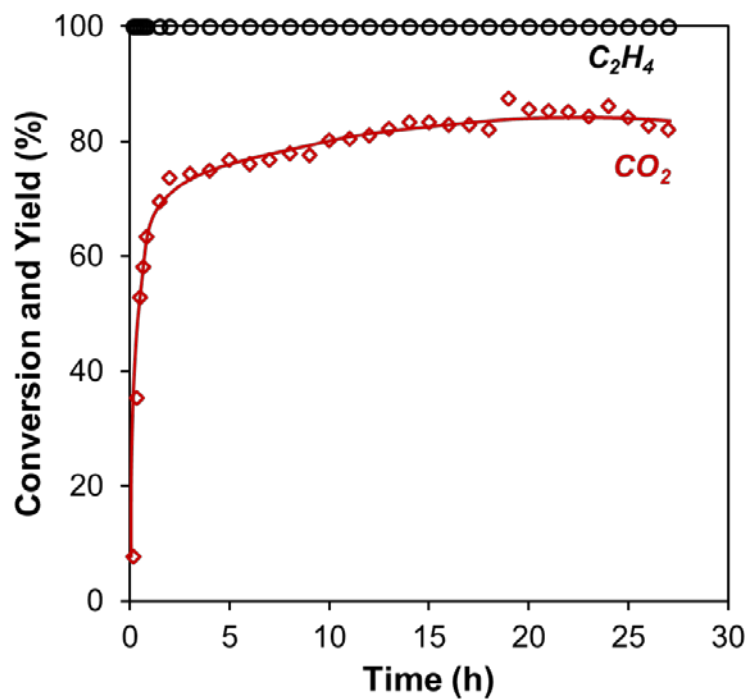

**Figure S6.** Time courses for ethylene conversion (black circles) and  $CO_2$  yield (red diamonds) over Pt/SBA-15 at 25 °C. Reaction conditions: Pt/SBA-15 0.40 g (Pt 1.8 wt%),  $C_2H_4$  50 ppm,  $O_2$  20%,  $N_2$  5 %, He balance, SV 1500 mL h<sup>-1</sup> g<sup>-1</sup>.
